# Supplementary material for: The Nlrp6 inflammasome is not required for baseline colonic inner mucus layer formation or function
Source: PubMed Central journal article supplement — J Exp Med. 2019 Aug 16;216(11):2602–18. doi: 10.1084/jem.20190679 (PMC6829596; doi:10.1084/jem.20190679), 2019-08-16
Supplement: JEM_20190679_sm.pdf [file JEM_20190679_sm.pdf]

## Supplemental material

Volk et al., <https://doi.org/10.1084/jem.20190679>

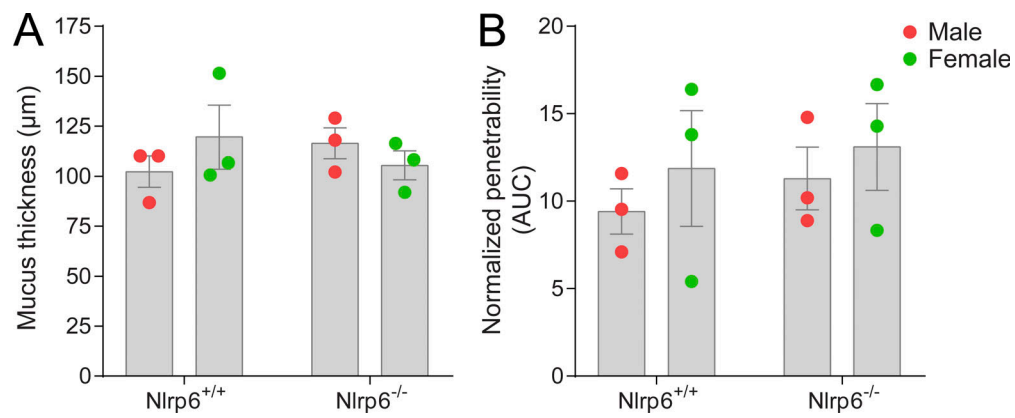

Figure S1. **Comparison of IML thickness and barrier function in *Nlrp6*<sup>+/+</sup> and *Nlrp6*<sup>-/-</sup> male and female mice. (A and B)** Data are pooled from two independent experiments (three animals per experiment). AUC, area under the curve. Error bars are SEM.

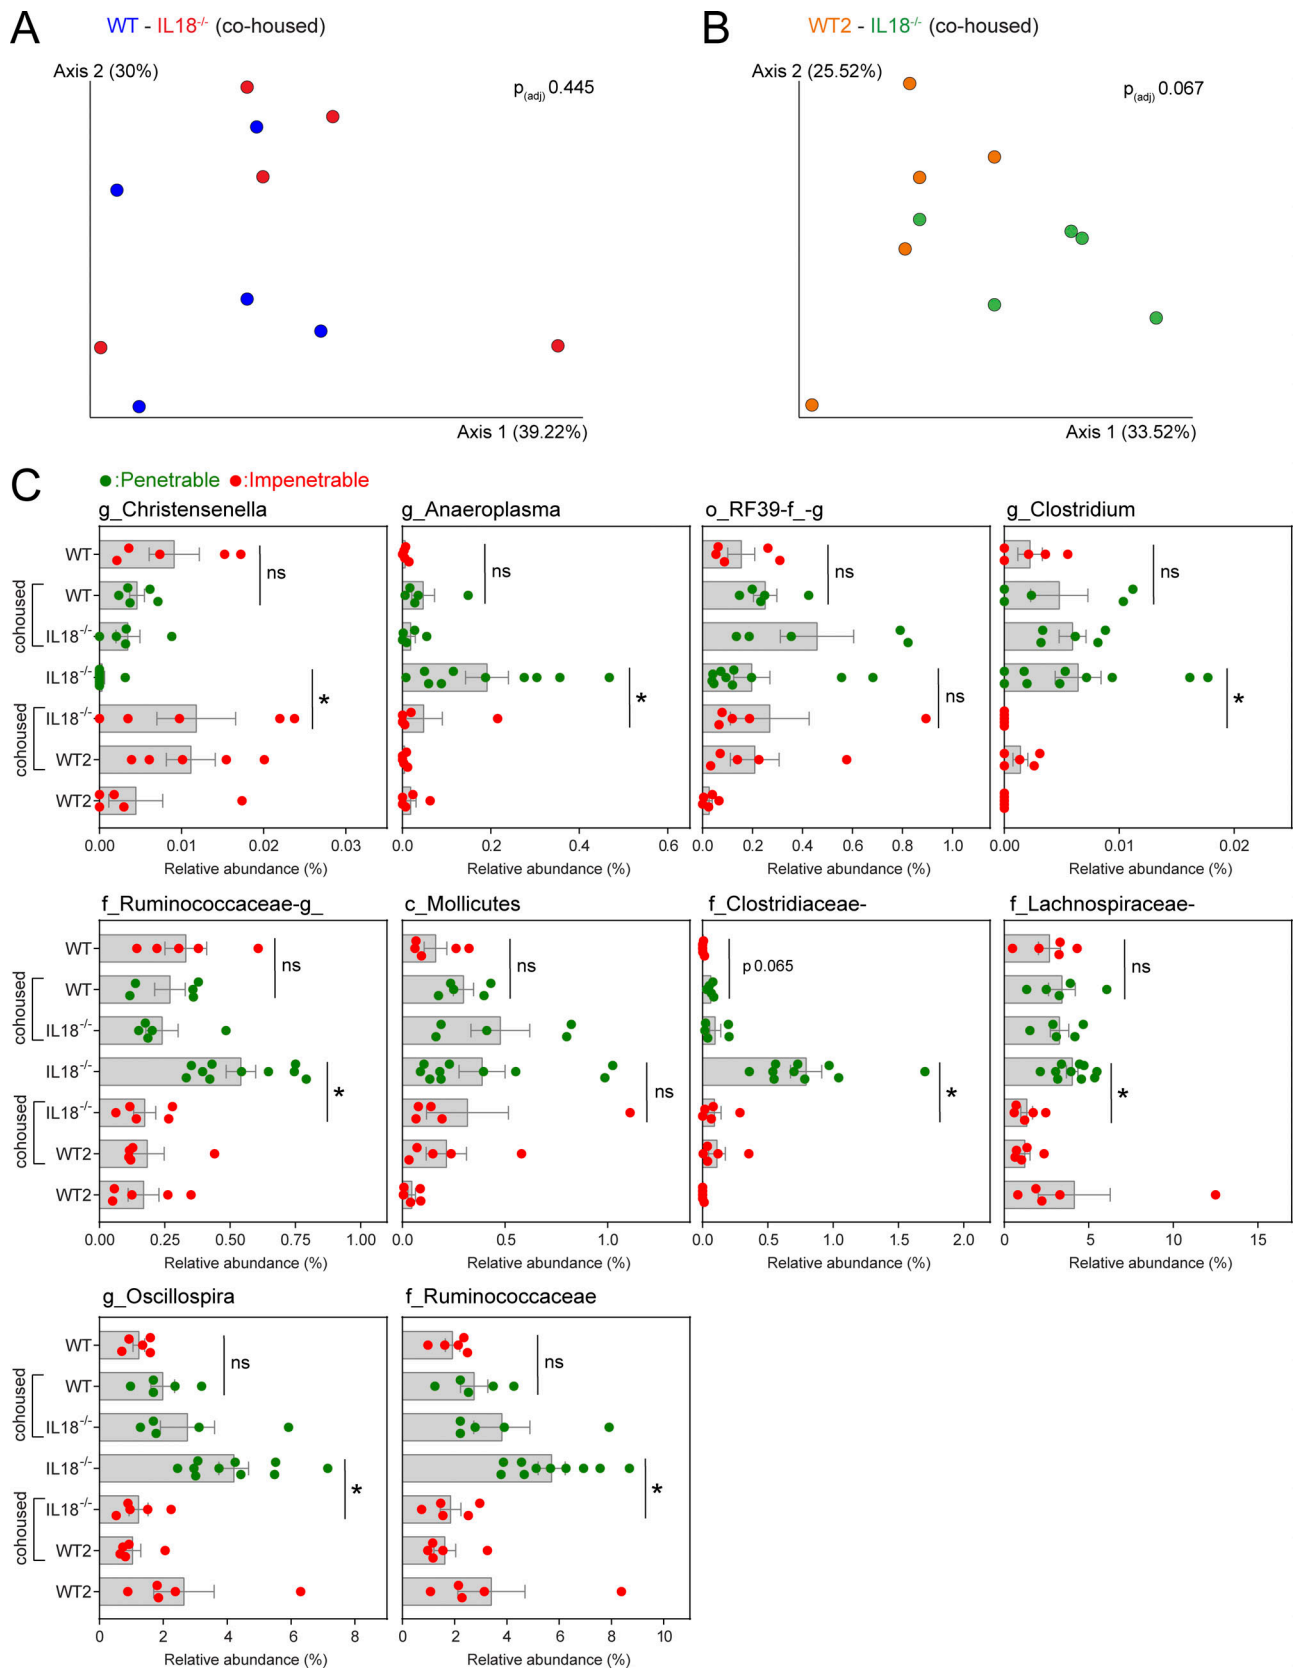

Figure S2. **Microbiota profiling in mice with divergent IML phenotypes continued.** Related to Fig. 6. (A and B) Principal component analysis of  $\beta$ -diversity (weighted UniFrac) from bacterial communities in experiments cohousing WT with *Il18*<sup>-/-</sup> (A) and WT2 with *Il18*<sup>-/-</sup> mice (B). (C) Relative abundance of specific taxa identified by LEfSe (Fig. 6 E) in different experimental groups; error bars represent SEM of  $n = 5$ –10 mice; \*,  $P < 0.05$ , significance determined by Dunn's multiple comparison. All data are pooled from two independent experiments (five animals per experiment). ns, not significant.

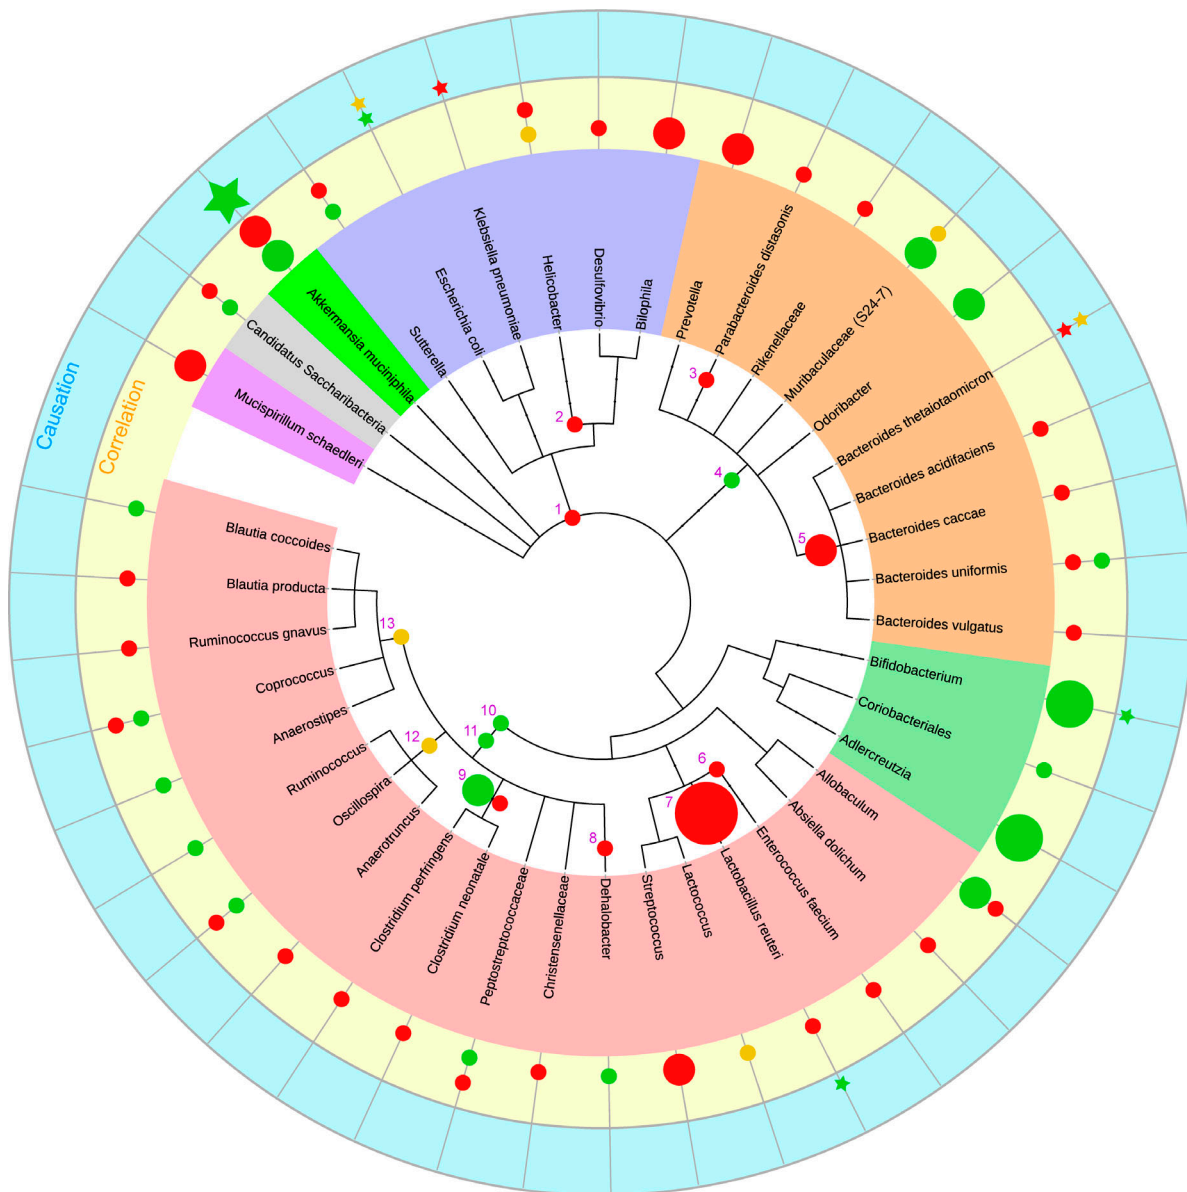

- Bacterial phyla:**
- Actinobacteria
  - Bacteroidetes
  - Deferribacteres
  - Firmicutes
  - Proteobacteria
  - Unclassified
  - Verrucomicrobia

**Data quantifying bacterial abundance and mucus thickness/barrier function:**

| Association  | Data points | Relationship      |
|--------------|-------------|-------------------|
| Correlation: | ● ● ● ●     | Positive: ● / ★   |
| Causation:   | ★ ★ ★ ★     | Mixed/none: ● / ★ |
|              | 1 2 3 4     | Negative: ● / ★   |

- Internal taxonomic node key:**
- 1: Proteobacteria
  - 2: Epsilon proteobacteria
  - 3: Parabacteriodes
  - 4: Bacteroides
  - 5: Bacteroides
  - 6: Enterococcaceae
  - 7: Lactobacillus
  - 8: Peptococcaceae
  - 9: Clostridiaceae
  - 10: Clostridia
  - 11: Clostridiales
  - 12: Ruminococcaceae
  - 13: Lachnospiraceae

Figure S3. **Correlative and causative relationships between IML thickness and/or barrier function and the abundance of bacterial taxa in the colonic microbiota.** Related to Fig. 6. Phylogenetic tree displaying bacteria that covary with IML thickness and/or barrier function identified in public datasets. Each data point represents one independent observation. Branches terminate in the lowest ranked taxon (genus or species) identified. Positive (green), mixed/none (yellow), or negative (red) associations between taxon abundance and IML function are indicated in the inner (correlative association; circles) and outer (causative association; stars) rings. IML associations with higher ranked taxa are indicated on tree nodes and identified in the internal taxonomic node key.

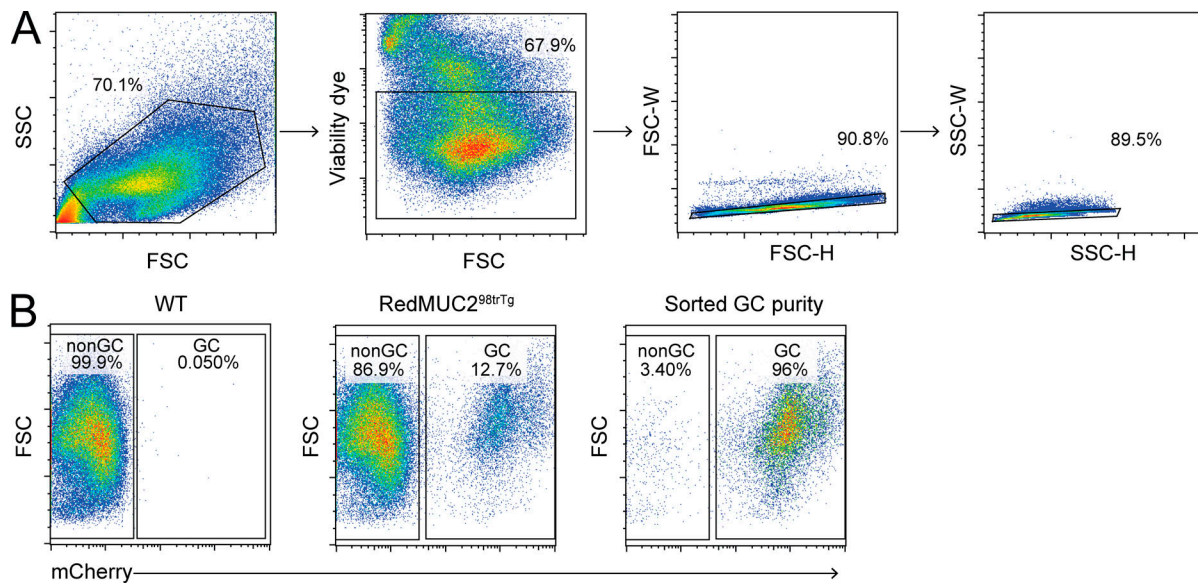

Figure S4. **Gating and sorting strategy for FACS isolation of mCherry<sup>+</sup> and mCherry<sup>-</sup> cells.** Related to Fig. 1, B and C; Fig. 4 A; and Fig. 5 A. **(A)** Gating strategy to isolate live single cells from debris, dead cells, and doublets. **(B)** Gating of live single cells based on mCherry signal to sort non-goblet cell (nonGC; mCherry<sup>-</sup>) and goblet cell (GC; mCherry<sup>+</sup>) fractions. Isolated goblet cells were resorted to check purity. Data are representative of four independent experiments.

Table S1. **List of all mouse strains used in the current study**

| Mouse strain                   | Designation                                         | Source                                                   |
|--------------------------------|-----------------------------------------------------|----------------------------------------------------------|
| WT                             | C57BL/6                                             | Long-term colony established at University of Gothenburg |
| WT2                            | C57BL/6                                             | Colony purchased from Taconic Biosciences                |
| mCherry-MUC2 transgenic mouse  | RedMUC2 <sup>98trTg</sup>                           | Birchenough et al., 2016                                 |
| <i>Nlrp3</i> <sup>-/-</sup>    | B6.Nlrp3 <sup>tm1</sup>                             | Martinon et al., 2006                                    |
| <i>Nlr4</i> <sup>-/-</sup>     | B6.C2-Nlr4 <sup>tm1Vmd</sup>                        | Mariathasan et al., 2004                                 |
| <i>Nlrp6</i> <sup>-/-</sup>    | B6.129/Sv-Nlrp6 <sup>tm1.1Kuv/LAS</sup>             | Chen et al., 2011                                        |
| <i>Casp1/11</i> <sup>-/-</sup> | B6.129S2-Casp1 <sup>tm1Sesh</sup>                   | Li et al., 1995                                          |
| <i>Casp11</i> <sup>-/-</sup>   | B6.Casp11 <sup>tm1</sup>                            | Kayagaki et al., 2011                                    |
| <i>Il1ab</i> <sup>-/-</sup>    | B6.D-IL1a <sup>tm1Yiw</sup> /IL1b <sup>tm1Yiw</sup> | Horai et al., 1998                                       |
| <i>Il18</i> <sup>-/-</sup>     | B6.129P2-Il18 <sup>tm1Aki</sup>                     | Takeda et al., 1998                                      |

Table S2. List of all qRT-PCR primers

| Gene    | Primer (F/R) | Source/sequence (5'-3') | Primer ID      |
|---------|--------------|-------------------------|----------------|
| Aim2    | F            | Sigma-Aldrich           | FM1_Aim2       |
| Aim2    | R            | Sigma-Aldrich           | RM1_Aim2       |
| Asc     | F            | Sigma-Aldrich           | FM1_Pycard     |
| Asc     | R            | Sigma-Aldrich           | RM1_Pycard     |
| Car1    | F            | Sigma-Aldrich           | FM1_Car1       |
| Car1    | R            | Sigma-Aldrich           | RM1_Car1       |
| Casp1   | F/R          | Bio-Rad                 | qMmuCID0026983 |
| Casp11  | F/R          | Bio-Rad                 | qMmuCID0005809 |
| Clca1   | F            | Sigma-Aldrich           | FM1_Clca3      |
| Clca1   | R            | Sigma-Aldrich           | RM1_Clca3      |
| Clca4a  | F            | Sigma-Aldrich           | FM1_Clca6      |
| Clca4a  | R            | Sigma-Aldrich           | RM1_Clca6      |
| Gapdh   | F            | GGAGAAACCTGCCAAGTATG    | N/A            |
| Gapdh   | R            | GGAGTTGCTGTTGAAGTCG     | N/A            |
| Ifi204  | F            | Sigma-Aldrich           | FM1_ifi204     |
| Ifi204  | R            | Sigma-Aldrich           | RM1_ifi204     |
| Il13ra1 | F            | Sigma-Aldrich           | FM1_Il13ra1    |
| Il13ra1 | R            | Sigma-Aldrich           | RM1_Il13ra1    |
| Il18    | F            | Sigma-Aldrich           | FM1_Il18       |
| Il18    | R            | Sigma-Aldrich           | RM1_Il18       |
| Il18r1  | F            | Sigma-Aldrich           | FM1_Il18r1     |
| Il18r1  | R            | Sigma-Aldrich           | RM1_Il18r1     |
| Il18rap | F            | Sigma-Aldrich           | FM1_Il18rap    |
| Il18rap | R            | Sigma-Aldrich           | RM1_Il18rap    |
| Il1b    | F            | Sigma-Aldrich           | FM1_Il1b       |
| Il1b    | R            | Sigma-Aldrich           | RM1_Il1b       |
| Il4ra   | F            | Sigma-Aldrich           | FM1_Il4ra      |
| Il4ra   | R            | Sigma-Aldrich           | RM1_Il4ra      |
| Nlrc4   | F            | Sigma-Aldrich           | FM1_Nlrc4      |
| Nlrc4   | R            | Sigma-Aldrich           | RM1_Nlrc4      |
| Nlrp12  | F            | Sigma-Aldrich           | FM1_Nlrp12     |
| Nlrp12  | R            | Sigma-Aldrich           | RM1_Nlrp12     |
| Nlrp1b  | F            | Sigma-Aldrich           | FM1_Nlrp1b     |
| Nlrp1b  | R            | Sigma-Aldrich           | RM1_Nlrp1b     |
| Nlrp2   | F            | Sigma-Aldrich           | FM1_Nlrp2      |
| Nlrp2   | R            | Sigma-Aldrich           | RM1_Nlrp2      |
| Nlrp3   | F            | Sigma-Aldrich           | FM1_Nlrp3      |
| Nlrp3   | R            | Sigma-Aldrich           | RM1_Nlrp3      |
| Nlrp6   | F/R          | Bio-Rad                 | qMmuCID0024291 |
| Nlrp9b  | F            | Sigma-Aldrich           | FM1_Nlrp9b     |
| Nlrp9b  | R            | Sigma-Aldrich           | RM1_Nlrp9b     |
| Nos2    | F            | CTTGGTGAAAGTGGTCTTTG    | N/A            |
| Nos2    | R            | TCAGACTCCCTGTCTCAGTAG   | N/A            |

Table S2. List of all qRT-PCR primers (Continued)

| Gene  | Primer (F/R) | Source/sequence (5'-3')    | Primer ID |
|-------|--------------|----------------------------|-----------|
| Pyrin | F            | Sigma-Aldrich              | FM1_Mefv  |
| Pyrin | R            | Sigma-Aldrich              | RM1_Mefv  |
| Rig1  | F            | Sigma-Aldrich              | FM1_Ddx58 |
| Rig1  | R            | Sigma-Aldrich              | RM1_Ddx58 |
| Rplpo | F            | GCGACCTGGAAGTCCAATA        | N/A       |
| Rplpo | R            | TCTCCAGAGCTGGTTGTTT        | N/A       |
| Tff3  | F            | Sigma-Aldrich              | FM1_Tff3  |
| Tff3  | R            | Sigma-Aldrich              | RM1_Tff3  |
| Tnfa  | F            | CAGGCGGTGCCTATGTCTC        | N/A       |
| Tnfa  | R            | CGATCACCCCGAAGTTCAGTA<br>G | N/A       |

F, forward; N/A, not applicable; R, reverse.

Table S3. **Data references for identified microbiota-IML associations**

| <b>Bacterial taxon</b>             | <b>Effect on colonic mucus layer</b>                       | <b>Reference</b>                       |
|------------------------------------|------------------------------------------------------------|----------------------------------------|
| <i>Adlercreutzia</i>               | Positively correlated with mucus barrier function          | <a href="#">Chassaing et al., 2015</a> |
| <i>Adlercreutzia</i>               | Multiple positive correlations with mucus barrier function | <a href="#">Schroeder et al., 2018</a> |
| <i>Adlercreutzia</i>               | Multiple positive correlations with mucus barrier function | Current study                          |
| <i>Akkermansia muciniphilia</i>    | Positively correlated mucus thickness                      | <a href="#">Zhu et al., 2018</a>       |
| <i>A. muciniphilia</i>             | Increases mucus thickness                                  | <a href="#">Everard et al., 2013</a>   |
| <i>A. muciniphilia</i>             | Increases mucus thickness                                  | <a href="#">Ganesh et al., 2013</a>    |
| <i>A. muciniphilia</i>             | Increases mucus thickness                                  | <a href="#">Dingemans et al., 2015</a> |
| <i>A. muciniphilia</i>             | Negatively correlated with mucus thickness                 | <a href="#">Desai et al., 2016</a>     |
| <i>A. muciniphilia</i>             | Negatively correlated with mucus barrier function          | <a href="#">Chassaing et al., 2015</a> |
| <i>A. muciniphilia</i>             | Positively correlated with mucus barrier function          | <a href="#">Schroeder et al., 2018</a> |
| <i>Allobaculum</i>                 | Positively correlated with mucus barrier function          | <a href="#">Jakobsson et al., 2015</a> |
| <i>Allobaculum</i>                 | Positively correlated with mucus barrier function          | <a href="#">Chassaing et al., 2015</a> |
| <i>Allobaculum</i>                 | Multiple negative correlations with mucus barrier function | <a href="#">Schroeder et al., 2018</a> |
| <i>Anaerostipes</i>                | Positively correlated with mucus barrier function          | <a href="#">Jakobsson et al., 2015</a> |
| <i>Anaerotruncus</i>               | Negatively correlated with mucus barrier function          | <a href="#">Chassaing et al., 2015</a> |
| <i>Bacteriodes</i>                 | Negatively correlated with mucus barrier function          | <a href="#">Jakobsson et al., 2015</a> |
| <i>Bacteriodes</i>                 | Negatively correlated with mucus barrier function          | <a href="#">Schroeder et al., 2018</a> |
| <i>Bacteriodes acidifaciens</i>    | Negatively correlated with mucus barrier function          | <a href="#">Thaiss et al., 2016</a>    |
| <i>Bacteriodes uniformis</i>       | Negatively correlated with mucus thickness                 | <a href="#">Desai et al., 2016</a>     |
| <i>Bacteroidales</i>               | Positively correlated with mucus thickness                 | <a href="#">Wlodarska et al., 2011</a> |
| <i>Bacteroides caccae</i>          | Negatively correlated with mucus thickness                 | <a href="#">Desai et al., 2016</a>     |
| <i>Bacteroides thetaiotomicron</i> | No effect on mucus thickness                               | <a href="#">Li et al., 2015</a>        |
| <i>B. thetaiotomicron</i>          | Decreases mucus thickness (monocolonization)               | <a href="#">Earle et al., 2015</a>     |
| <i>Bacteroides vulgatus</i>        | Negatively correlated with mucus thickness                 | <a href="#">Elderman et al., 2017</a>  |
| <i>Bifidobacteria</i>              | Increased mucus growth                                     | <a href="#">Schroeder et al., 2018</a> |
| <i>Bifidobacteria</i>              | Positively correlated with mucus thickness                 | <a href="#">Pélissier et al., 2010</a> |
| <i>Bifidobacteria</i>              | Positively correlated with mucus barrier function          | <a href="#">Chassaing et al., 2015</a> |
| <i>Bifidobacteria</i>              | Positively correlated with mucus barrier function          | <a href="#">Zou et al., 2018</a>       |
| <i>Bilofila</i>                    | Negatively correlated with mucus barrier function          | <a href="#">Chassaing et al., 2015</a> |
| <i>Bilofila</i>                    | Multiple negative correlations with mucus barrier function | <a href="#">Schroeder et al., 2018</a> |
| <i>Blautia coccoides</i>           | Positively correlated with mucus thickness                 | <a href="#">Wlodarska et al., 2011</a> |
| <i>Blautia producta</i>            | Negative correlations with mucus barrier function          | <a href="#">Chassaing et al., 2015</a> |
| <i>Christensenellaceae</i>         | Negatively correlated with mucus barrier function          | <a href="#">Schroeder et al., 2018</a> |
| <i>Clostridia</i>                  | Positively correlated with mucus barrier function          | <a href="#">Johansson et al., 2015</a> |
| <i>Clostridiaceae</i>              | Positively correlated with increased mucus thickness       | <a href="#">Wlodarska et al., 2015</a> |
| <i>Clostridiaceae</i>              | Negative correlations with mucus barrier function          | <a href="#">Chassaing et al., 2015</a> |
| <i>Clostridiaceae</i>              | Positively correlated with mucus barrier function          | <a href="#">Schroeder et al., 2018</a> |
| <i>Clostridiales</i>               | Positively correlated with mucus thickness                 | <a href="#">Glymenaki et al., 2017</a> |
| <i>Clostridium neonatale</i>       | Negative correlations with mucus barrier function          | <a href="#">Chassaing et al., 2015</a> |
| <i>Clostridium perfringens</i>     | Negative correlations with mucus barrier function          | <a href="#">Chassaing et al., 2015</a> |
| <i>Coprococcus</i>                 | Positively correlated with mucus barrier function          | <a href="#">Chassaing et al., 2015</a> |
| <i>Coprococcus</i>                 | Multiple negative correlations with mucus barrier function | <a href="#">Schroeder et al., 2018</a> |
| <i>Coriobacteriales</i>            | Positively correlated with mucus barrier function          | <a href="#">Chassaing et al., 2015</a> |
| <i>Dehalobacteriaceae</i>          | Positively correlated with mucus barrier function          | <a href="#">Chassaing et al., 2015</a> |



Table S3. **Data references for identified microbiota–IML associations (Continued)**

| <b>Bacterial taxon</b>            | <b>Effect on colonic mucus layer</b>                           | <b>Reference</b>                       |
|-----------------------------------|----------------------------------------------------------------|----------------------------------------|
| <i>Desulfovibrio</i>              | Negatively correlated with mucus barrier function              | <a href="#">Jakobsson et al., 2015</a> |
| <i>Enterococcaceae</i>            | Negatively correlated with mucus barrier function              | <a href="#">Zou et al., 2018</a>       |
| <i>Enterococcus faecium</i>       | Negatively correlated with mucus thickness                     | <a href="#">Hendrickx et al., 2015</a> |
| <i>Epsilon proteobacteria</i>     | Negatively correlated with mucus barrier function              | <a href="#">Jakobsson et al., 2015</a> |
| <i>E. coli</i>                    | Increases mucus thickness (monocolonization)                   | <a href="#">Tomas et al., 2015</a>     |
| <i>E. coli</i>                    | No effect on mucus thickness                                   | <a href="#">Li et al., 2015</a>        |
| <i>Eubacterium dolichum</i>       | Negative correlations with mucus barrier function              | <a href="#">Chassaing et al., 2015</a> |
| <i>Helicobacter</i>               | Negative and positive correlations with mucus barrier function | <a href="#">Chassaing et al., 2015</a> |
| <i>Helicobacter</i>               | Multiple negative correlations with mucus barrier function     | <a href="#">Schroeder et al., 2018</a> |
| <i>Klebsiella pneumoniae</i>      | Decreases mucus barrier function                               | <a href="#">Caballero et al., 2015</a> |
| <i>Lachnospiraceae</i>            | Negative and positive correlations with mucus barrier function | <a href="#">Chassaing et al., 2015</a> |
| <i>Lactobacillaceae</i>           | Negatively correlated with mucus barrier function              | <a href="#">Chassaing et al., 2015</a> |
| <i>Lactobacillus</i>              | Negatively correlated with mucus thickness                     | <a href="#">Wlodarska et al., 2011</a> |
| <i>Lactobacillus</i>              | Negatively correlated with mucus barrier function              | <a href="#">Chassaing et al., 2015</a> |
| <i>Lactobacillus</i>              | Negatively correlated with mucus barrier function              | <a href="#">Johansson et al., 2015</a> |
| <i>Lactobacillus</i>              | Negatively correlated with mucus barrier function              | <a href="#">Schroeder et al., 2018</a> |
| <i>Lactobacillus reuteri</i>      | Negatively correlated with mucus barrier function              | <a href="#">Thaiss et al., 2016</a>    |
| <i>L. reuteri</i>                 | Increases mucus thickness                                      | <a href="#">Ahl et al., 2016</a>       |
| <i>Lactococcus</i>                | Multiple negative correlations with mucus barrier function     | <a href="#">Schroeder et al., 2018</a> |
| <i>Mucispirillum schaedleri</i>   | Negatively correlated with mucus barrier function              | <a href="#">Thaiss et al., 2016</a>    |
| <i>M. schaedleri</i>              | Negatively correlated with mucus barrier function              | <a href="#">Schroeder et al., 2018</a> |
| <i>Odoribacter</i>                | Positively correlated with mucus barrier function              | <a href="#">Chassaing et al., 2015</a> |
| <i>Odoribacter</i>                | Multiple positive correlations with mucus barrier function     | <a href="#">Schroeder et al., 2018</a> |
| <i>Oscillospira</i>               | Positively correlated with mucus barrier function              | <a href="#">Chassaing et al., 2015</a> |
| <i>Oscillospira</i>               | Negatively correlated with mucus barrier function              | <a href="#">Schroeder et al., 2018</a> |
| <i>Parabacteroides</i>            | Negatively correlated with mucus barrier function              | <a href="#">Jakobsson et al., 2015</a> |
| <i>Parabacteroides distasonis</i> | Negatively correlated with mucus barrier function              | <a href="#">Chassaing et al., 2015</a> |
| <i>Peptococcaceae</i>             | Negatively correlated with mucus barrier function              | <a href="#">Schroeder et al., 2018</a> |
| <i>Peptostreptococcaceae</i>      | Positively correlated with increased mucus thickness           | <a href="#">Wlodarska et al., 2015</a> |
| <i>Peptostreptococcaceae</i>      | Negatively correlated with mucus barrier function              | <a href="#">Chassaing et al., 2015</a> |
| <i>Prevotella</i>                 | Negatively correlated with mucus barrier function              | <a href="#">Jakobsson et al., 2015</a> |
| <i>Prevotella</i>                 | Negatively correlated with mucus barrier function              | <a href="#">Chassaing et al., 2015</a> |
| <i>Proteobacteria</i>             | Negatively correlated with mucus barrier function              | <a href="#">Zou et al., 2018</a>       |
| <i>Rikenellaceae</i>              | Negatively correlated with mucus barrier function              | <a href="#">Chassaing et al., 2015</a> |
| <i>Ruminococcaceae</i>            | Negative and positive correlations with mucus barrier function | <a href="#">Chassaing et al., 2015</a> |
| <i>Ruminococcus</i>               | Multiple positive correlations with mucus barrier function     | <a href="#">Schroeder et al., 2018</a> |
| <i>Ruminococcus gnavus</i>        | Negatively correlated with mucus barrier function              | <a href="#">Thaiss et al., 2016</a>    |
| S24-7                             | Negative and positive correlations with mucus barrier function | <a href="#">Chassaing et al., 2015</a> |
| S24-7                             | Multiple positive correlations with mucus barrier function     | <a href="#">Schroeder et al., 2018</a> |
| S24-7                             | Multiple positive correlations with mucus barrier function     | Current study                          |
| <i>Streptococcus</i>              | Negatively correlated with mucus barrier function              | <a href="#">Zou et al., 2018</a>       |
| <i>Streptococcus</i>              | Negatively correlated with mucus barrier function              | <a href="#">Schroeder et al., 2018</a> |
| <i>Sutterella</i>                 | Negatively correlated with mucus barrier function              | <a href="#">Chassaing et al., 2015</a> |
| <i>Sutterella</i>                 | Multiple positive correlations with mucus barrier function     | <a href="#">Schroeder et al., 2018</a> |



Table S3. **Data references for identified microbiota–IML associations (Continued)**

| Bacterial taxon | Effect on colonic mucus layer                     | Reference              |
|-----------------|---------------------------------------------------|------------------------|
| TM7             | Negatively correlated with mucus barrier function | Jakobsson et al., 2015 |
| TM7             | Positively correlated with mucus barrier function | Chassaing et al., 2015 |

## References

- Ahl, D., H. Liu, O. Schreiber, S. Roos, M. Phillipson, and L. Holm. 2016. *Lactobacillus reuteri* increases mucus thickness and ameliorates dextran sulphate sodium-induced colitis in mice. *Acta Physiol. (Oxf)*. 217:300–310. <https://doi.org/10.1111/apha.12695>
- Birchenough, G.M., E.E. Nyström, M.E. Johansson, and G.C. Hansson. 2016. A sentinel goblet cell guards the colonic crypt by triggering Nlrp6-dependent Muc2 secretion. *Science*. 352:1535–1542. <https://doi.org/10.1126/science.aaf7419>
- Caballero, S., R. Carter, X. Ke, B. Sušac, I.M. Leiner, G.J. Kim, L. Miller, L. Ling, K. Manova, and E.G. Pamer. 2015. Distinct but Spatially Overlapping Intestinal Niches for Vancomycin-Resistant *Enterococcus faecium* and Carbapenem-Resistant *Klebsiella pneumoniae*. *PLoS Pathog*. 11:e1005132. <https://doi.org/10.1371/journal.ppat.1005132>
- Chassaing, B., O. Koren, J.K. Goodrich, A.C. Poole, S. Srinivasan, R.E. Ley, and A.T. Gewirtz. 2015. Dietary emulsifiers impact the mouse gut microbiota promoting colitis and metabolic syndrome. *Nature*. 519:92–96. <https://doi.org/10.1038/nature14232>
- Chen, G.Y., M. Liu, F. Wang, J. Bertin, and G. Núñez. 2011. A functional role for Nlrp6 in intestinal inflammation and tumorigenesis. *J. Immunol*. 186:7187–7194. <https://doi.org/10.4049/jimmunol.1100412>
- Desai, M.S., A.M. Seekatz, N.M. Koropatkin, N. Kamada, C.A. Hickey, M. Wolter, N.A. Pudlo, S. Kitamoto, N. Terrapon, A. Muller, et al. 2016. A Dietary Fiber-Deprived Gut Microbiota Degrades the Colonic Mucus Barrier and Enhances Pathogen Susceptibility. *Cell*. 167:1339–1353.e21. <https://doi.org/10.1016/j.cell.2016.10.043>
- Dingemans, C., C. Belzer, S.A. van Hijum, M. Günthel, D. Salvatori, J.T. den Dunnen, E.J. Kuijper, P. Devilee, W.M. de Vos, G.B. van Ommen, and E.C. Robanus-Maandag. 2015. Akkermansia muciniphila and Helicobacter typhlonius modulate intestinal tumor development in mice. *Carcinogenesis*. 36:1388–1396. <https://doi.org/10.1093/carcin/bgv120>
- Earle, K.A., G. Billings, M. Sigal, J.S. Lichtman, G.C. Hansson, J.E. Elias, M.R. Amieva, K.C. Huang, and J.L. Sonnenburg. 2015. Quantitative Imaging of Gut Microbiota Spatial Organization. *Cell Host Microbe*. 18:478–488. <https://doi.org/10.1016/j.chom.2015.09.002>
- Elderman, M., B. Sovran, F. Hugenholtz, K. Graversen, M. Huijskes, E. Houtsmas, C. Belzer, M. Boekschoten, P. de Vos, J. Dekker, et al. 2017. The effect of age on the intestinal mucus thickness, microbiota composition and immunity in relation to sex in mice. *PLoS One*. 12:e0184274. <https://doi.org/10.1371/journal.pone.0184274>
- Everard, A., C. Belzer, L. Geurts, J.P. Ouwerkerk, C. Druart, L.B. Bindels, Y. Guiot, M. Derrien, G.G. Muccioli, N.M. Delzenne, et al. 2013. Cross-talk between Akkermansia muciniphila and intestinal epithelium controls diet-induced obesity. *Proc. Natl. Acad. Sci. USA*. 110:9066–9071. <https://doi.org/10.1073/pnas.1219451110>
- Ganesh, B.P., R. Klopfeisch, G. Loh, and M. Blaut. 2013. Commensal Akkermansia muciniphila exacerbates gut inflammation in Salmonella Typhimurium-infected gnotobiotic mice. *PLoS One*. 8:e74963. <https://doi.org/10.1371/journal.pone.0074963>
- Glymenaki, M., G. Singh, A. Brass, G. Warhurst, A.J. McBain, K.J. Else, and S.M. Cruickshank. 2017. Compositional Changes in the Gut Mucus Microbiota Precede the Onset of Colitis-Induced Inflammation. *Inflamm. Bowel Dis*. 23:912–922. <https://doi.org/10.1097/MIB.0000000000001118>
- Hendrickx, A.P., J. Top, J.R. Bayjanov, H. Kemperman, M.R. Rogers, F.L. Paganelli, M.J. Bonten, and R.J. Willems. 2015. Antibiotic-Driven Dysbiosis Mediates Intraluminal Agglutination and Alternative Segregation of Enterococcus faecium from the Intestinal Epithelium. *MBio*. 6:e01346–e15. <https://doi.org/10.1128/mBio.01346-15>
- Horai, R., M. Asano, K. Sudo, H. Kanuka, M. Suzuki, M. Nishihara, M. Takahashi, and Y. Iwakura. 1998. Production of mice deficient in genes for interleukin (IL)-1alpha, IL-1beta, IL-1alpha/beta, and IL-1 receptor antagonist shows that IL-1beta is crucial in turpentine-induced fever development and glucocorticoid secretion. *J. Exp. Med*. 187:1463–1475. <https://doi.org/10.1084/jem.187.9.1463>
- Jakobsson, H.E., A.M. Rodríguez-Piñero, A. Schütte, A. Ermund, P. Boysen, M. Bemark, F. Sommer, F. Bäckhed, G.C. Hansson, and M.E. Johansson. 2015. The composition of the gut microbiota shapes the colon mucus barrier. *EMBO Rep*. 16:164–177. <https://doi.org/10.15252/embr.201439263>
- Johansson, M.E., H.E. Jakobsson, J. Holmén-Larsson, A. Schütte, A. Ermund, A.M. Rodríguez-Piñero, L. Arike, C. Wising, F. Svensson, F. Bäckhed, and G.C. Hansson. 2015. Normalization of Host Intestinal Mucus Layers Requires Long-Term Microbial Colonization. *Cell Host Microbe*. 18:582–592. <https://doi.org/10.1016/j.chom.2015.10.007>
- Kayagaki, N., S. Warming, M. Lamkanfi, L. Vande Walle, S. Louie, J. Dong, K. Newton, Y. Qu, J. Liu, S. Heldens, et al. 2011. Non-canonical inflammasome activation targets caspase-11. *Nature*. 479:117–121. <https://doi.org/10.1038/nature10558>
- Li, H., J.P. Limenitakis, T. Fuhrer, M.B. Geuking, M.A. Lawson, M. Wyss, S. Brugiroux, I. Keller, J.A. Macpherson, S. Rupp, et al. 2015. The outer mucus layer hosts a distinct intestinal microbial niche. *Nat. Commun*. 6:8292. <https://doi.org/10.1038/ncomms9292>
- Li, P., H. Allen, S. Banerjee, S. Franklin, L. Herzog, C. Johnston, J. McDowell, M. Paskind, L. Rodman, J. Salfeld, et al. 1995. Mice deficient in IL-1 beta-converting enzyme are defective in production of mature IL-1 beta and resistant to endotoxic shock. *Cell*. 80:401–411. [https://doi.org/10.1016/0092-8674\(95\)90490-5](https://doi.org/10.1016/0092-8674(95)90490-5)
- Mariathasan, S., K. Newton, D.M. Monack, D. Vucic, D.M. French, W.P. Lee, M. Roose-Girma, S. Erickson, and V.M. Dixit. 2004. Differential activation of the inflammasome by caspase-1 adaptors ASC and Ipaf. *Nature*. 430:213–218. <https://doi.org/10.1038/nature02664>
- Martinon, F., V. Pétrilli, A. Mayor, A. Tardivel, and J. Tschopp. 2006. Gout-associated uric acid crystals activate the NALP3 inflammasome. *Nature*. 440:237–241. <https://doi.org/10.1038/nature04516>
- Pélessier, M.A., N. Vasquez, R. Balamurugan, E. Pereira, F. Dossou-Yovo, A. Suau, P. Pochart, and F. Magne. 2010. Metronidazole effects on microbiota and mucus layer thickness in the rat gut. *FEMS Microbiol. Ecol*. 73:601–610.
- Schroeder, B.O., G.M.H. Birchenough, M. Ståhlman, L. Arike, M.E.V. Johansson, G.C. Hansson, and F. Bäckhed. 2018. Bifidobacteria or Fiber Protects against Diet-Induced Microbiota-Mediated Colonic Mucus Deterioration. *Cell Host Microbe*. 23:27–40.e7. <https://doi.org/10.1016/j.chom.2017.11.004>
- Takeda, K., H. Tsutsui, T. Yoshimoto, O. Adachi, N. Yoshida, T. Kishimoto, H. Okamura, K. Nakanishi, and S. Akira. 1998. Defective NK cell activity and Th1 response in IL-18-deficient mice. *Immunity*. 8:383–390. [https://doi.org/10.1016/S1074-7613\(00\)80543-9](https://doi.org/10.1016/S1074-7613(00)80543-9)
- Thaiss, C.A., M. Levy, T. Korem, L. Dohnalová, H. Shapiro, D.A. Jaitin, E. David, D.R. Winter, M. Gury-BenAri, E. Tatrovsky, et al. 2016. Microbiota Diurnal Rhythmicity Programs Host Transcriptome Oscillations. *Cell*. 167:1495–1510.e12. <https://doi.org/10.1016/j.cell.2016.11.003>

- Tomas, J., J. Reygner, C. Mayeur, R. Ducroc, S. Bouet, C. Bridonneau, J.B. Cavin, M. Thomas, P. Langella, and C. Cherbuy. 2015. Early colonizing *Escherichia coli* elicits remodeling of rat colonic epithelium shifting toward a new homeostatic state. *ISME J.* 9:46–58. <https://doi.org/10.1038/ismej.2014.111>
- Wlodarska, M., B. Willing, K.M. Keeney, A. Menendez, K.S. Bergstrom, N. Gill, S.L. Russell, B.A. Vallance, and B.B. Finlay. 2011. Antibiotic treatment alters the colonic mucus layer and predisposes the host to exacerbated *Citrobacter rodentium*-induced colitis. *Infect. Immun.* 79:1536–1545. <https://doi.org/10.1128/IAI.01104-10>
- Wlodarska, M., B.P. Willing, D.M. Bravo, and B.B. Finlay. 2015. Phytonutrient diet supplementation promotes beneficial *Clostridia* species and intestinal mucus secretion resulting in protection against enteric infection. *Sci. Rep.* 5:9253. <https://doi.org/10.1038/srep09253>
- Zhu, L., D. Zhang, H. Zhu, J. Zhu, S. Weng, L. Dong, T. Liu, Y. Hu, and X. Shen. 2018. Berberine treatment increases *Akkermansia* in the gut and improves high-fat diet-induced atherosclerosis in *Apoe*<sup>-/-</sup> mice. *Atherosclerosis.* 268:117–126. <https://doi.org/10.1016/j.atherosclerosis.2017.11.023>
- Zhu, S., S. Ding, P. Wang, Z. Wei, W. Pan, N.W. Palm, Y. Yang, H. Yu, H.B. Li, G. Wang, et al. 2017. Nlrp9b inflammasome restricts rotavirus infection in intestinal epithelial cells. *Nature.* 546:667–670. <https://doi.org/10.1038/nature22967>
- Zhu, W., J. Yan, C. Zhi, Q. Zhou, and X. Yuan. 2019. 1,25(OH)<sub>2</sub>D<sub>3</sub> deficiency-induced gut microbial dysbiosis degrades the colonic mucus barrier in *Cyp27b1* knockout mouse model. *Gut Pathog.* 11:8. <https://doi.org/10.1186/s13099-019-0291-z>
- Zou, J., B. Chassaing, V. Singh, M. Pellizzon, M. Ricci, M.D. Fythe, M.V. Kumar, and A.T. Gewirtz. 2018. Fiber-Mediated Nourishment of Gut Microbiota Protects against Diet-Induced Obesity by Restoring IL-22-Mediated Colonic Health. *Cell Host Microbe.* 23:41–53.e4. <https://doi.org/10.1016/j.chom.2017.11.003>
